# Supplementary material for: The phenotypic and genotypic spectrum of epilepsy and intellectual disability in adults: Implications for genetic testing
Source: PubMed Central journal article supplement — Epilepsia Open. 2023 Mar 17;8(2):497–508. doi: 10.1002/epi4.12719 (PMC10235558; doi:10.1002/epi4.12719), 2023-03-17
Supplement: EPI4-8-497-s002.pdf [file EPI4-8-497-s002.pdf]

**Supplementary table 1: Phenotypic details, variant information and presence of the gene on commercial gene panels for the 14 probands with identified likely pathogenic or pathogenic variants**

| Gene                                | <i>PACS2</i> | <i>NSUN2</i>                                                 | <i>CACNA1A</i>                                      | del 6q21-22.31                             | <i>TDP2</i>                                        | del 9q34.11 | <i>NEXMIF</i>                             | <i>SCN1A</i> | <i>SCN1A</i>                                                                         | <i>CHD2</i> | <i>KDM6B</i> | <i>NUS1</i> | <i>ALDH7A1</i>                                                          | <i>TANGO2</i> | <i>CTCF</i>                | <i>SYNGAPI</i>           |
|-------------------------------------|--------------|--------------------------------------------------------------|-----------------------------------------------------|--------------------------------------------|----------------------------------------------------|-------------|-------------------------------------------|--------------|--------------------------------------------------------------------------------------|-------------|--------------|-------------|-------------------------------------------------------------------------|---------------|----------------------------|--------------------------|
| Patient Identifier                  | 784          | 922                                                          | 952                                                 | 1165                                       | 1218                                               | 1229        | 1239                                      | 1260         | 1328                                                                                 | 1344        | 1348         | 1356        | 1621                                                                    | 1625          | 1703                       | 1728                     |
| Sex                                 | male         | male                                                         | female                                              | male                                       | female                                             | female      | female                                    | female       | female                                                                               | female      | male         | female      | male                                                                    | female        | male                       | female                   |
| Age (years)                         | 24           | 27                                                           | 23                                                  | 49                                         | 21                                                 | 23          | 34                                        | 24           | 30                                                                                   | 27          | 31           | 24          | 23                                                                      | 21            | 22                         | 38                       |
| <b>Family History</b>               |              |                                                              |                                                     |                                            |                                                    |             |                                           |              |                                                                                      |             |              |             |                                                                         |               |                            |                          |
| Consanguinity                       | No           | Yes (parents are cousins)                                    | No                                                  | Yes (parents are cousins)                  | Yes (parents are cousins)                          | No          | No                                        | No           | No                                                                                   | No          | No           | No          | Yes (maternal great-grand-mother and paternal grandmother were cousins) | No            | No                         | No                       |
| Family history of epilepsy          | No           | No                                                           | Father and paternal half-sister affected            | Paternal aunt and father's cousin and aunt | No, but brother has severe intellectual disability | No          | No                                        | No           | No                                                                                   | No          | No           | No          | Father and paternal aunt affected                                       | No            | No                         | Monozygous twin affected |
| <b>Risk factors</b>                 |              |                                                              |                                                     |                                            |                                                    |             |                                           |              |                                                                                      |             |              |             |                                                                         |               |                            |                          |
| Prenatal problems                   | No           | No                                                           | No                                                  | No                                         | No                                                 | No          | No                                        | No           | No                                                                                   | No          | No           | No          | No                                                                      | No            | No                         | No                       |
| Perinatal problems                  | No           | No                                                           | No                                                  | Forceps                                    | Cyanosis after birth                               | No          | No                                        | No           | No                                                                                   | No          | No           | No          | Breech position, cyanosis after birth                                   | Suction cup   | No                         | No                       |
| Spontaneous birth/caesarean section | Spontaneous  | Caesarean section (planned, triplets, other two are healthy) | Spontaneous                                         | Spontaneous                                | Spontaneous                                        | Spontaneous | Spontaneous                               | Spontaneous  | Spontaneous                                                                          | Unknown     | Spontaneous  | Unknown     | Emergency caesarean section                                             | Spontaneous   | Unknown                    | Spontaneous              |
| Premature birth                     | 32 weeks     | 36 weeks                                                     | No                                                  | No                                         | No                                                 | No          | No                                        | No           | No                                                                                   | No          | No           | No          | No                                                                      | No            | No                         | No                       |
| Postnatal intensive care            | No           | Yes                                                          | No                                                  | No                                         | No                                                 | No          | No                                        | No           | No                                                                                   | No          | No           | No          | No                                                                      | No            | No                         | No                       |
| Febrile seizures                    | No           | No                                                           | Yes (multiple simple febrile seizures, age unknown) | Yes (18 months)                            | No                                                 | No          | Yes (single febrile seizure, age unknown) | No           | Yes (febrile seizures from 6 mths-6 yrs, 1/8 weeks), different from epileptic spasms | No          | No           | No          | No                                                                      | No            | No                         | No                       |
| Meningitis/Encephalitis             | No           | No                                                           | No                                                  | No                                         | No                                                 | No          | No                                        | No           | No                                                                                   | No          | No           | No          | No                                                                      | No            | No                         | No                       |
| Traumatic brain injury              | No           | No                                                           | No                                                  | No                                         | No                                                 | No          | No                                        | Yes          | No                                                                                   | No          | No           | No          | No                                                                      | No            | No                         | No                       |
| Other neurological conditions       | No           | No                                                           | No                                                  | No                                         | No                                                 | No          | No                                        | No           | No                                                                                   | No          | No           | No          | No                                                                      | No            | No                         | No                       |
| <b>Epilepsy</b>                     |              |                                                              |                                                     |                                            |                                                    |             |                                           |              |                                                                                      |             |              |             |                                                                         |               |                            |                          |
| Age of onset (years)                | 0            | 2                                                            | 2                                                   | 4                                          | 14                                                 | 10          | 2.5                                       | 0.3          | 0.5                                                                                  | 3           | 18           | 3           | 0.1                                                                     | 17            | 11                         | 2.5                      |
| Epilepsy type/location              | Focal        | Generalized                                                  | Generalized                                         | Unknown                                    | Unknown                                            | Multifocal  | Generalized                               | Multifocal   | Multifocal                                                                           | Generalized | Generalized  | Multifocal  | Generalized                                                             | Generalized   | Focal, right temporal lobe | Generalized              |

| Gene                                                         | <i>PACS2</i>                | <i>NSUN2</i>                                                                                                  | <i>CACNA1A</i>                                           | del 6q21-22.31                                         | <i>TDP2</i>                                                                                    | del 9q34.11                                   | <i>NEXMIF</i>                                                                                                                      | <i>SCN1A</i>                                         | <i>SCN1A</i>                                                                | <i>CHD2</i>                                              | <i>KDM6B</i>       | <i>NUS1</i>                                                                                                                                                     | <i>ALDH7A1</i>                                  | <i>TANGO2</i>                                       | <i>CTCF</i>                         | <i>SYNGAP1</i>                         |
|--------------------------------------------------------------|-----------------------------|---------------------------------------------------------------------------------------------------------------|----------------------------------------------------------|--------------------------------------------------------|------------------------------------------------------------------------------------------------|-----------------------------------------------|------------------------------------------------------------------------------------------------------------------------------------|------------------------------------------------------|-----------------------------------------------------------------------------|----------------------------------------------------------|--------------------|-----------------------------------------------------------------------------------------------------------------------------------------------------------------|-------------------------------------------------|-----------------------------------------------------|-------------------------------------|----------------------------------------|
| Patient Identifier                                           | 784                         | 922                                                                                                           | 952                                                      | 1165                                                   | 1218                                                                                           | 1229                                          | 1239                                                                                                                               | 1260                                                 | 1328                                                                        | 1344                                                     | 1348               | 1356                                                                                                                                                            | 1621                                            | 1625                                                | 1703                                | 1728                                   |
| Epilepsy syndrome                                            |                             | LGS                                                                                                           |                                                          |                                                        |                                                                                                |                                               |                                                                                                                                    |                                                      |                                                                             |                                                          | JME                | CSWS                                                                                                                                                            |                                                 |                                                     |                                     | Doose syndrome                         |
| <b>Seizure types</b>                                         |                             |                                                                                                               |                                                          |                                                        |                                                                                                |                                               |                                                                                                                                    |                                                      |                                                                             |                                                          |                    |                                                                                                                                                                 |                                                 |                                                     |                                     |                                        |
| Semiology I                                                  | Generalized atonic seizures | Unknown onset tonic seizures                                                                                  | Absence seizures                                         | Myoclonic-atonic seizures                              | Unknown onset behavioral arrest seizures                                                       | Unknown onset tonic seizures                  | Absence                                                                                                                            | GTCS                                                 | Focal aware motor seizures (versive seizures)                               | Absence seizures                                         | Myoclonic seizures | FIAS (dyscognitive seizures)                                                                                                                                    | Generalized tonic seizures                      | Absence seizures                                    | FIAS (dialeptic/automotor seizures) | Myoclonic-atonic seizures              |
| Semiology II                                                 | FIAS                        | Unknown origin behavioral arrest                                                                              | GTCS                                                     | Myoclonic seizures                                     | Unknown atonic/tonic seizures                                                                  | Focal aware motor seizures (versive seizures) | Myoclonic seizures                                                                                                                 |                                                      | Epileptic spasms (seizure free since the age of 6 years)                    | GTCS                                                     | GTCS               | GTCS                                                                                                                                                            | GTCS                                            | GTCS                                                | FBTCS                               | Absence with eyelid myoclonia          |
| Semiology III                                                | FBCTS                       | Epileptic spasms                                                                                              |                                                          | GTCS                                                   | FBTCS                                                                                          | Unknown onset behavior arrest                 |                                                                                                                                    |                                                      | FBTCS                                                                       |                                                          |                    |                                                                                                                                                                 |                                                 |                                                     |                                     |                                        |
| Age at last seizure (years)                                  | 21                          | Ongoing                                                                                                       | Ongoing                                                  | Ongoing                                                | Ongoing                                                                                        | 19                                            | Ongoing                                                                                                                            | 22                                                   | Ongoing                                                                     | 26                                                       | 20                 | 13                                                                                                                                                              | Ongoing                                         | 21                                                  | 21                                  | 15                                     |
| Seizure free for > 1 year                                    | Yes                         | No                                                                                                            | No                                                       | No                                                     | No                                                                                             | Yes                                           | No                                                                                                                                 | Yes                                                  | No                                                                          | No                                                       | Yes                | No                                                                                                                                                              | No                                              | No                                                  | No                                  | Yes                                    |
| Frequency (per month, over the last three month)             | 0                           | 45                                                                                                            | 6                                                        | 3                                                      | 15                                                                                             | 0                                             | 3                                                                                                                                  | 0                                                    | 30                                                                          | 0                                                        | 0                  | Ongoing ESES                                                                                                                                                    | 0.3                                             | 0                                                   | 0                                   | 0                                      |
| <b>Status epilepticus</b>                                    |                             |                                                                                                               |                                                          |                                                        |                                                                                                |                                               |                                                                                                                                    |                                                      |                                                                             |                                                          |                    |                                                                                                                                                                 |                                                 |                                                     |                                     |                                        |
| Type and frequency                                           | None                        | None                                                                                                          | None                                                     | None                                                   | None                                                                                           | None                                          | None                                                                                                                               | None                                                 | Focal status epilepticus                                                    | Absences status epilepticus                              | None               | ESES, every night                                                                                                                                               | Several                                         | Absence status epilepticus                          | None                                | None                                   |
| Age (years)                                                  |                             |                                                                                                               |                                                          |                                                        |                                                                                                |                                               |                                                                                                                                    |                                                      | 29                                                                          | 23                                                       |                    | Ongoing                                                                                                                                                         | Last at 21                                      | 17                                                  |                                     |                                        |
| <b>Diagnostic tests</b>                                      |                             |                                                                                                               |                                                          |                                                        |                                                                                                |                                               |                                                                                                                                    |                                                      |                                                                             |                                                          |                    |                                                                                                                                                                 |                                                 |                                                     |                                     |                                        |
| Age at EEG (years)                                           | 24                          | 21                                                                                                            | 23                                                       | 44                                                     | 14                                                                                             | 19                                            | 31                                                                                                                                 | 22                                                   | 29                                                                          | 23                                                       | 25                 | 20                                                                                                                                                              | 21                                              | 19                                                  | 22                                  | 35                                     |
| Non-epileptic abnormalities                                  | Mild encephalopathy         | Severe encephalopathy                                                                                         | Mild encephalopathy                                      | Mild encephalopathy, left lateral cerebral dysfunction | None                                                                                           | Moderate encephalopathy                       | Moderate encephalopathy, right lateral cerebral dysfunction                                                                        | None                                                 | Moderate to severe encephalopathy                                           | Mild encephalopathy                                      | None               | None                                                                                                                                                            | Moderate encephalopathy                         | Moderate encephalopathy                             | Right temporal cerebral dysfunction | Mild encephalopathy                    |
| Interictal epileptiform discharges (localization, frequency) | None                        | Generalized sharp-slow-wave complexes (2.5/s). Generalized sharp waves with bifrontal and frontopolar maximum | Generalized spike-waves complexes with bifrontal maximum | Generalized spike-wave complexes                       | Bifrontal (right>left) sharp waves, temporal sharp waves with bifrontal and bioccipital spread | Bifrontal sharp waves                         | Generalized poly-spike wave (right temporal maximum). Right temporal sharp wave and poly-spike wave. Breach rhythm right temporal. | Generalized sharp waves, left temporal seizure onset | Sharp waves left central, seizure onset zone both frontal and frontocentral | Generalized spike waves complexes with bifrontal maximum | None               | Repetitive, left-hemispheric sharp waves with maximum at F3, P3, and T3, increased in sleep stages 3 and 4 (80% of EEG). Single sharp waves also in wakefulness | Generalized spikes waves with bifrontal maximum | Generalized 3 Hz spikes wave complexes, poly-spikes | None                                | Generalized 3 Hz spikes wave complexes |

| Gene                                                     | <i>PACS2</i>                                                     | <i>NSUN2</i>                                                                                         | <i>CACNA1A</i>                    | del 6q21-22.31                                                          | <i>TDP2</i>                            | del 9q34.11           | <i>NEXMIF</i>                                                                                                                  | <i>SCN1A</i>                                 | <i>SCN1A</i>                                                                                     | <i>CHD2</i>                             | <i>KDM6B</i>               | <i>NUS1</i>                                                   | <i>ALDH7A1</i> | <i>TANGO2</i>                                                                                                                                                                  | <i>CTCF</i>            | <i>SYNGAP1</i>                         |
|----------------------------------------------------------|------------------------------------------------------------------|------------------------------------------------------------------------------------------------------|-----------------------------------|-------------------------------------------------------------------------|----------------------------------------|-----------------------|--------------------------------------------------------------------------------------------------------------------------------|----------------------------------------------|--------------------------------------------------------------------------------------------------|-----------------------------------------|----------------------------|---------------------------------------------------------------|----------------|--------------------------------------------------------------------------------------------------------------------------------------------------------------------------------|------------------------|----------------------------------------|
| Patient Identifier                                       | 784                                                              | 922                                                                                                  | 952                               | 1165                                                                    | 1218                                   | 1229                  | 1239                                                                                                                           | 1260                                         | 1328                                                                                             | 1344                                    | 1348                       | 1356                                                          | 1621           | 1625                                                                                                                                                                           | 1703                   | 1728                                   |
| Photic stimulation (Waltz et al 1992)                    | No effect                                                        | NA                                                                                                   | Photoparoxysmal reaction grade IV | No effect                                                               | NA                                     | NA                    | NA                                                                                                                             | Photoparoxysmal reaction grade IV            | NA                                                                                               | No effect                               | NA                         | NA                                                            | NA             | NA                                                                                                                                                                             | Photic driving         | No effect                              |
| Hyperventilation effect                                  | No effect                                                        | NA                                                                                                   | No effect                         | No effect                                                               | No effect                              | No effect             | Increased frequency of sharp waves                                                                                             | No effect                                    | No effect                                                                                        | No effect                               | No effect                  | No effect                                                     | NA             | NA                                                                                                                                                                             | No effect              | No effect                              |
| Age at MRI (years)                                       | 17                                                               | 2.75                                                                                                 | 21                                | 44                                                                      | 13                                     | 15                    | 31                                                                                                                             | 22                                           | Unknown                                                                                          | 18                                      | 18                         | 5                                                             | NA             | 19                                                                                                                                                                             | 20                     | Childhood                              |
| Results                                                  | Right mesiotemporal cystic lesion, suspicious of a ganglioglioma | Normal                                                                                               | Normal                            | Nonepileptic abnormality: non-specific white matter lesions bilaterally | Normal                                 | Normal                | Nonepileptic abnormality: Arachnoid cyst right temporal with displacement of the right temporal pole, hippocampus and amygdala | Normal                                       | Normal                                                                                           | Nonepileptic abnormality: Pinealis cyst | Normal                     | Nonepileptic abnormality: Left lateral cystic thalamic lesion | NA             | Nonepileptic abnormality: Lacunar defect in the right thalamus. Small calcifications at the tentorium on the right and at the falx cerebri frontal without pathological value. | Normal                 | Normal                                 |
| <b>Antiseizure medication</b>                            |                                                                  |                                                                                                      |                                   |                                                                         |                                        |                       |                                                                                                                                |                                              |                                                                                                  |                                         |                            |                                                               |                |                                                                                                                                                                                |                        |                                        |
| Antiseizure medications tried                            | LTG                                                              | PB, VPA, VGB, Nitrazepam, PHT, ESM, TPM, PRM, LTG, LEV, ZNS, PER, BRV, ZNS, CLZ, Petinutin, MSM, ZNS | VPA, ESM, BRV, TPM, PER, LEV, LTG | PHB, CZP, PHT, PRM, VPA, LEV, TPM, LCM                                  | LTG, ZNS, BRV, OXC, ESL, LEV, STM, VPA | TPM, OXC, LEV, LCM, V | LCM, VPA, ZNS, TPM, LEV, BRV, PER                                                                                              | BR, PB, LTG, VPA, LEV, ZNS                   | PB, CLB, ESM, MSM, LTG, AZA, VGB, CBZ, PHT, PRM, TPM, LEV, STM, RUF, LCM, PGB, ZNS, BR, VPA, STP | STM, LCM, LEV, PER, LTG, VPA            | OXC, LTG, TPM, VPA         | STM, VPA, CLB, ESM, LTG, PHT, MSM, TPM, GBP, LEV, ZNS, CLZ    | VPA            | LTG, BRV, LEV, VPA                                                                                                                                                             | LTG, LEV, LCM, BRV     | PB, ESM, VPA                           |
| Pharmacorefractory                                       | No                                                               | Yes                                                                                                  | Yes                               | Yes                                                                     | Yes                                    | No                    | Yes                                                                                                                            | No                                           | Yes                                                                                              | Yes                                     | No                         | No                                                            | No             | Yes                                                                                                                                                                            | Yes                    | No                                     |
| Responsive on these antiseizure medications              | LTG                                                              | NA                                                                                                   | VPA                               | NA                                                                      | None                                   | LTG                   | None                                                                                                                           | VPA                                          | None                                                                                             | Unknown                                 | VPA                        | Unknown                                                       | VPA            | VPA                                                                                                                                                                            | BRV                    | VPA                                    |
| <b>Comorbidities</b>                                     |                                                                  |                                                                                                      |                                   |                                                                         |                                        |                       |                                                                                                                                |                                              |                                                                                                  |                                         |                            |                                                               |                |                                                                                                                                                                                |                        |                                        |
| Psychiatric disorders                                    | None                                                             | None                                                                                                 | Depression                        | Visual and acoustic hallucinations on topiramate                        | None                                   | Autistic features     | Psychobehavioral side effect with perampanel                                                                                   | Aggressive behavior, psychosis on zonisamide | Behavioral disorder, autistic traits                                                             | None                                    | Autistic spectrum disorder | None                                                          | None           | None                                                                                                                                                                           | Early childhood autism | Organic behavioral disorder            |
| Age of onset (years)                                     |                                                                  |                                                                                                      | 21                                | 44                                                                      |                                        | 1                     | 31                                                                                                                             | 19                                           | NA                                                                                               |                                         | NA                         |                                                               |                |                                                                                                                                                                                | NA                     | Unknown                                |
| Status at last follow up (remitted, persistent, unknown) |                                                                  |                                                                                                      | Remitted                          | Remitted                                                                |                                        | Persistent            | Remitted                                                                                                                       | Remitted                                     | Persistent                                                                                       |                                         | Persistent                 |                                                               |                |                                                                                                                                                                                | Persistent             | Persistent                             |
| Therapy                                                  |                                                                  |                                                                                                      | Psychotherapy, antidepressant     | Withdrawal of topiramate                                                |                                        | None                  | Withdrawal of perampanel                                                                                                       | Risperidone, withdrawal of zonisamide        | Citalopram                                                                                       |                                         | Risperidone                |                                                               |                |                                                                                                                                                                                | None                   | Opipramol/risperidone, now: Clonazepam |

| Gene                                                            | <i>PACS2</i>                                       | <i>NSUN2</i>                                                                                                                                                      | <i>CACNA1A</i>                                          | del 6q21-22.31                                                                                                 | <i>TDP2</i>                                                                                        | del 9q34.11                            | <i>NEXMIF</i>                                                                                                             | <i>SCN1A</i>                              | <i>SCN1A</i>                                               | <i>CHD2</i>                         | <i>KDM6B</i>                        | <i>NUS1</i>                                                                                                          | <i>ALDH7A1</i>                                               | <i>TANGO2</i>                                                                                                                                                                                                                                   | <i>CTCF</i>                                                                                                     | <i>SYNGAP1</i>                      |  |
|-----------------------------------------------------------------|----------------------------------------------------|-------------------------------------------------------------------------------------------------------------------------------------------------------------------|---------------------------------------------------------|----------------------------------------------------------------------------------------------------------------|----------------------------------------------------------------------------------------------------|----------------------------------------|---------------------------------------------------------------------------------------------------------------------------|-------------------------------------------|------------------------------------------------------------|-------------------------------------|-------------------------------------|----------------------------------------------------------------------------------------------------------------------|--------------------------------------------------------------|-------------------------------------------------------------------------------------------------------------------------------------------------------------------------------------------------------------------------------------------------|-----------------------------------------------------------------------------------------------------------------|-------------------------------------|--|
| Patient Identifier                                              | 784                                                | 922                                                                                                                                                               | 952                                                     | 1165                                                                                                           | 1218                                                                                               | 1229                                   | 1239                                                                                                                      | 1260                                      | 1328                                                       | 1344                                | 1348                                | 1356                                                                                                                 | 1621                                                         | 1625                                                                                                                                                                                                                                            | 1703                                                                                                            | 1728                                |  |
| Other comorbidities/organ involvement                           | Scaly exanthema of unclear etiology, hallux valgus | Dyskinetic cerebral palsy, short stature, microcephaly, nephrocalcinosis, kidney stones in infancy, leuko- and thrombocytopenia most likely induced by mesuximide | Migraine, cerebellar ataxia                             | chronic viral hepatitis C, hemophilia A (factor VIII residual activity approx. 4-5%), diabetes mellitus type 2 | Arthrogryposis                                                                                     | secondary microcephaly, cholelithiasis | Chronic allergic asthma, acquired left facial nerve paresis, puncture of the right temporal arachnoid cyst at age 6 years | Ataxia, scoliosis with surgical treatment | Hypothyroidism, steatosis hepatis, obstructive sleep apnea |                                     |                                     | Right-sided renal agenesis, celiac disease                                                                           |                                                              | Suspected congenital myasthenia with compound heterozygous variants of uncertain significance in the <i>ARGN</i> gene, mild sensorineural hearing loss, phonetic-phonological disorder, orofacial myofunctional disorder, latent hypothyroidism | Microcephaly, slim statue with long extremities and joint hypermobility, pneumonia age 4 years (intensive care) |                                     |  |
| <b>Intellectual development</b>                                 |                                                    |                                                                                                                                                                   |                                                         |                                                                                                                |                                                                                                    |                                        |                                                                                                                           |                                           |                                                            |                                     |                                     |                                                                                                                      |                                                              |                                                                                                                                                                                                                                                 |                                                                                                                 |                                     |  |
| Age of onset developmental delay (years)                        | 0.25                                               | 0                                                                                                                                                                 | 4                                                       | 8                                                                                                              | 0                                                                                                  | 1                                      | 1                                                                                                                         | 0.3                                       | 2                                                          | 0                                   | 0                                   | 3.5                                                                                                                  | 0.1                                                          | 3                                                                                                                                                                                                                                               | 0.75                                                                                                            | 2.5                                 |  |
| Neonatal/childhood Intellectual development until first seizure | NA                                                 | Delayed                                                                                                                                                           | Normal                                                  | Normal                                                                                                         | Delayed                                                                                            | Delayed                                | Delayed                                                                                                                   | Normal                                    | Normal                                                     | Delayed                             | Delayed                             | Normal                                                                                                               | Normal                                                       | Delayed                                                                                                                                                                                                                                         | Delayed                                                                                                         | Normal                              |  |
| Intellectual development after onset of seizures                | Delayed                                            | Regression                                                                                                                                                        | Delayed                                                 | Delayed                                                                                                        | No further alteration                                                                              | Delayed                                | No further alteration                                                                                                     | Delayed                                   | Delayed                                                    | No further alteration               | No further alteration               | Regression                                                                                                           | Delayed                                                      | No further alteration                                                                                                                                                                                                                           | No further alteration                                                                                           | Regression                          |  |
| Milestone: Verbal ability (age first words)                     | NA                                                 | NA                                                                                                                                                                | NA                                                      | NA                                                                                                             | NA                                                                                                 | 1.5                                    | 4                                                                                                                         | NA                                        | 2                                                          | NA                                  | NA                                  | 1.25                                                                                                                 | NA                                                           | 3.4                                                                                                                                                                                                                                             | NA                                                                                                              | NA                                  |  |
| (School) education / graduation                                 | Secondary school                                   | NA                                                                                                                                                                | Regular primary school, then special school             | Special school                                                                                                 | Special school                                                                                     | Special school                         | Special school                                                                                                            | Special school                            | Special school                                             | Special school                      | Special school                      | Special school                                                                                                       | None                                                         | Regular school until age 15 years, afterwards special school                                                                                                                                                                                    | Special school                                                                                                  | Special school                      |  |
| Learning difficulties                                           | Reading, writing and arithmetics with limitations  | No reading, writing and arithmetics                                                                                                                               | Basic writing and reading, arithmetics with numbers <20 | Basic writing and reading, no arithmetics                                                                      | Speaking word by word without understanding content, writing simple words in print, counting to 10 | No reading, writing and arithmetics    | No reading, writing and arithmetics                                                                                       | No reading, writing and arithmetics       | No reading, writing and arithmetics                        | No reading, writing and arithmetics | No reading, writing and arithmetics | Deficits in spatial-constructive abilities, non-verbal memory and visual-spatial memory, detained executive function | No reading, writing and arithmetics, amnesic memory deficits | Dyscalculia                                                                                                                                                                                                                                     | Reading and writing rudimentary, arithmetic with numbers <10                                                    | No reading, writing and arithmetics |  |



| Gene                                                                              | <i>PACS2</i>                                         | <i>NSUN2</i>                                                                                                                                                  | <i>CACNA1A</i>                               | del 6q21-22.31              | <i>TDP2</i>                           | del 9q34.11                                 | <i>NEXMIF</i>                                                               | <i>SCN1A</i>                                    | <i>SCN1A</i>                                | <i>CHD2</i>                                                                                                    | <i>KDM6B</i>                                                                                                                                                               | <i>NUS1</i>                   | <i>ALDH7A1</i>                                | <i>TANGO2</i>                                                                                                                                                   | <i>CTCF</i>                                                     | <i>SYNGAP1</i>                                                                                                      |
|-----------------------------------------------------------------------------------|------------------------------------------------------|---------------------------------------------------------------------------------------------------------------------------------------------------------------|----------------------------------------------|-----------------------------|---------------------------------------|---------------------------------------------|-----------------------------------------------------------------------------|-------------------------------------------------|---------------------------------------------|----------------------------------------------------------------------------------------------------------------|----------------------------------------------------------------------------------------------------------------------------------------------------------------------------|-------------------------------|-----------------------------------------------|-----------------------------------------------------------------------------------------------------------------------------------------------------------------|-----------------------------------------------------------------|---------------------------------------------------------------------------------------------------------------------|
| Patient Identifier                                                                | 784                                                  | 922                                                                                                                                                           | 952                                          | 1165                        | 1218                                  | 1229                                        | 1239                                                                        | 1260                                            | 1328                                        | 1344                                                                                                           | 1348                                                                                                                                                                       | 1356                          | 1621                                          | 1625                                                                                                                                                            | 1703                                                            | 1728                                                                                                                |
| Nucleotide and amino acid change                                                  | NM_001100913:exon6:c.G625A:p.E209K                   | NM_017755:exon2:c.254+1G>A                                                                                                                                    | NM_001127221:exon5:c.G736A:p.E246K           | NA                          | NM_016614:exon6:c.650delG:p.G217Efs*7 | NA                                          | NM_001008537:exon3:c.C694T:p.Q232X                                          | NM_001353948:exon12:c.1813_1822del:p.R605Cfs*15 | NM_001202435:exon25:c.4476+1A>T             | NM_001271:exon30:c.G3782C:p.W1261S                                                                             | NM_001080424:exon19:c.C4357T:p.R1453C                                                                                                                                      | NM_138459:exon3:c.542-1G>A    | NM_001182:exon12:c.1054_1055del:p.K352Gfs*144 | NM_001283106:exon7:c.381-2A>G                                                                                                                                   | NM_001363916:exon3:c.608_611del:p.T204Rfs*17                    | NM_001130066:exon14:c.C2713T:p.Q905X                                                                                |
| Variant type                                                                      | Missense (known pathogenic variant, CADD score 26.1) | Splicing                                                                                                                                                      | Missense (CADD score 28.9)                   | Deletion                    | Truncation                            | Deletion                                    | Truncation                                                                  | Truncation                                      | Splicing                                    | Missense (CADD score 31)                                                                                       | Missense (CADD score 31)                                                                                                                                                   | Splicing                      | Truncation                                    | Splicing                                                                                                                                                        | Truncation                                                      | Truncation                                                                                                          |
| Inheritance                                                                       | Unknown                                              | Parents and sister heterozygous                                                                                                                               | Not present in mother, father unavailable    | Unknown                     | Parents heterozygous                  | De novo (paternity confirmed by trio exome) | De novo (paternity confirmed by microsatellite maker panel)                 | Not present in father, mother unavailable       | De novo (paternity confirmed by trio exome) | Not present in mother and brother, father unavailable                                                          | De novo (paternity confirmed by trio exome)                                                                                                                                | Unknown                       | Parents not available, must be heterozygous   | Mother heterozygous, father not available, must be heterozygous                                                                                                 | Not present in mother, father unavailable                       | De novo (paternity confirmed by trio exome), twin sister heterozygous as well                                       |
| ACMG interpretation                                                               | Likely pathogenic (PS1, PM2, PP3)                    | Pathogenic (PVS1, PM2, PM3)                                                                                                                                   | Likely pathogenic (PM1, PM2, PP2, PP3)       | Pathogenic (1A, 2A, 2H, 3B) | Pathogenic (PVS1, PM2, PM3)           | Pathogenic (1A, 2A, 3A, 4L)                 | Pathogenic (PVS1, PS2, PM2)                                                 | Pathogenic (PVS1, PM2, PP5, ?PS1)               | Pathogenic (PVS1, PS2, PM2, PP5)            | Likely pathogenic (PM2, PM5, PP2, PP3)                                                                         | Likely pathogenic (PS2, PM2, PP3)                                                                                                                                          | Likely pathogenic (PVS1, PM2) | Pathogenic (PVS1, PM2, PM3)                   | Pathogenic (PVS1, PM2, PM3)                                                                                                                                     | Likely pathogenic (PVS1, PM2)                                   | Pathogenic (PVS1, PS1, PS2, PM2, PP1)                                                                               |
| Frequency of epilepsy in patients with pathogenic variants in the respective gene | Seizures typical                                     | 7% seizures (1/11 Abbasi-Moheb et al. American Journal of Human Genetics 2012;90:847-855, 0/3 Khan et al. American Journal of Human Genetics 2012;90:856-863) | Broad phenotypic spectrum including seizures | NA                          | Seizures typical                      | NA                                          | 83% seizures (Stamberger et al. Genetics in Medicine 2021;23:363-373)       | Seizures typical                                | Seizures typical                            | 96% seizures (Carvill GL, Mefford HC. CHD2-Related Neurodevelopmental Disorders. GeneReviews January 21, 2021) | 17% febrile or afebrile seizures (1/12 patients had focal seizures and 1/12 febrile seizures in Stolerman et al. American Journal of Medical Genetics 2019;179A:1276-1286) | Seizures typical              | Seizures typical                              | 75% seizures (2/3 in Kremer et al. American Journal of Human Genetics 2016;98:358-362, 4/5 in Lalani et al. American Journal of Human Genetics 2016;98:347-357) | 11% (4/38 Konrad et al. Genetics in Medicine 2019;21:2723-2733) | 84% seizures (Holder JL, Hamdan FF, Michaud JL. SYNGAP1-Related Intellectual Disability. GeneReviews, Feb 21, 2019) |
| <b>Notes</b>                                                                      |                                                      |                                                                                                                                                               |                                              |                             |                                       |                                             | Patient published in Stamberger et al. Genetics in Medicine 2021;23:363-373 |                                                 |                                             |                                                                                                                |                                                                                                                                                                            |                               |                                               |                                                                                                                                                                 |                                                                 |                                                                                                                     |
| <b>Inclusion of gene in simulated gene panels</b>                                 |                                                      |                                                                                                                                                               |                                              |                             |                                       |                                             |                                                                             |                                                 |                                             |                                                                                                                |                                                                                                                                                                            |                               |                                               |                                                                                                                                                                 |                                                                 |                                                                                                                     |
| Ambry Genetics Epilepsy Next Panel (accessed April 22, 2022, 124 genes)           | No                                                   | No                                                                                                                                                            | Yes                                          | NA                          | No                                    | NA                                          | Yes                                                                         | Yes                                             | Yes                                         | Yes                                                                                                            | No                                                                                                                                                                         | No                            | Yes                                           | No                                                                                                                                                              | No                                                              | Yes                                                                                                                 |
| GeneDx Comprehensive Epilepsy Panel (accessed May 1, 2022, 144 genes)             | No                                                   | No                                                                                                                                                            | Yes                                          | NA                          | No                                    | NA                                          | Yes                                                                         | Yes                                             | Yes                                         | Yes                                                                                                            | No                                                                                                                                                                         | No                            | Yes                                           | No                                                                                                                                                              | No                                                              | Yes                                                                                                                 |

| Gene                                                                                        | <i>PACS2</i> | <i>NSUN2</i> | <i>CACNA1A</i> | del 6q21-22.31 | <i>TDP2</i> | del 9q34.11 | <i>NEXMIF</i> | <i>SCN1A</i> | <i>SCN1A</i> | <i>CHD2</i> | <i>KDM6B</i> | <i>NUS1</i> | <i>ALDH7A1</i> | <i>TANGO2</i> | <i>CTCF</i> | <i>SYNGAP1</i> |
|---------------------------------------------------------------------------------------------|--------------|--------------|----------------|----------------|-------------|-------------|---------------|--------------|--------------|-------------|--------------|-------------|----------------|---------------|-------------|----------------|
| Patient Identifier                                                                          | 784          | 922          | 952            | 1165           | 1218        | 1229        | 1239          | 1260         | 1328         | 1344        | 1348         | 1356        | 1621           | 1625          | 1703        | 1728           |
| Invitae Neurodevelopmental Disorders Panel (accessed April 23, 2022, 241 genes)             | Yes          | Yes          | Yes            | NA             | No          | NA          | Yes           | Yes          | Yes          | Yes         | No           | No          | Yes            | No            | No          | Yes            |
| Invitae Epilepsy Panel (accessed April 23, 2022, 320 genes)                                 | Yes          | No           | Yes            | NA             | No          | NA          | Yes           | Yes          | Yes          | Yes         | No           | Yes         | Yes            | Yes           | No          | Yes            |
| Blueprint Comprehensive Epilepsy Panel (accessed, April 23, 2022, 511 genes)                | Yes          | No           | Yes            | NA             | No          | NA          | Yes           | Yes          | Yes          | Yes         | No           | Yes         | Yes            | Yes           | No          | Yes            |
| Prevention Comprehensive Epilepsy and Seizure Panel (accessed April 23, 2022, 1478 genes)   | Yes          | Yes          | Yes            | NA             | Yes         | NA          | Yes           | Yes          | Yes          | Yes         | Yes          | Yes         | Yes            | Yes           | Yes         | Yes            |
| Ambry Genetics Neurodevelopmental Next Expanded Panel (accessed April 23, 2022, 1527 genes) | Yes          | Yes          | Yes            | NA             | Yes         | NA          | Yes           | Yes          | Yes          | Yes         | Yes          | Yes         | Yes            | Yes           | Yes         | Yes            |

AZA: acetazolamide, BR: bromide, BRV: brivaracetam, CBZ: carbamazepine, CLB: clobazam, CLZ: clonazepam, CSWS: epileptic encephalopathy with continuous spike-and-wave discharges during sleep, ESES: electrical status epilepticus in sleep, ESL: eslicarbazepine, ESM: ethosuximide, FBTCS: focal to bilateral tonic-clonic seizure, FIAS: focal impaired awareness seizure, GBP: gabapentin, GTCS: generalized tonic-clonic seizure, JME: juvenile myoclonic epilepsy, LCM: lacosamide, LEV: levetiracetam, LGS: Lennox Gastaut syndrome, LTG: lamotrigine, MSM: mesuximide, NA: not available/applicable, OXC: oxcarbazepine, PB: phenobarbital, PER: perampanel, PGB: pregabalin, PHT: phenytoin, PRM: primidone, RUF: rufinamide, STM: sultiam, STP: stiripentol, TPM: topiramate, VGB: vigabatrine, VPA: valproate, ZNS: zonisamide
