# Supplementary figures and images for: The phenotypic and genotypic spectrum of epilepsy and intellectual disability in adults: Implications for genetic testing
Source: PubMed Central journal article supplement — Epilepsia Open. 2023 Mar 17;8(2):497–508. doi: 10.1002/epi4.12719 (PMC10235558; doi:10.1002/epi4.12719), 2023-03-17

**A**

## conifer del chr6: 113970857 - 119349116

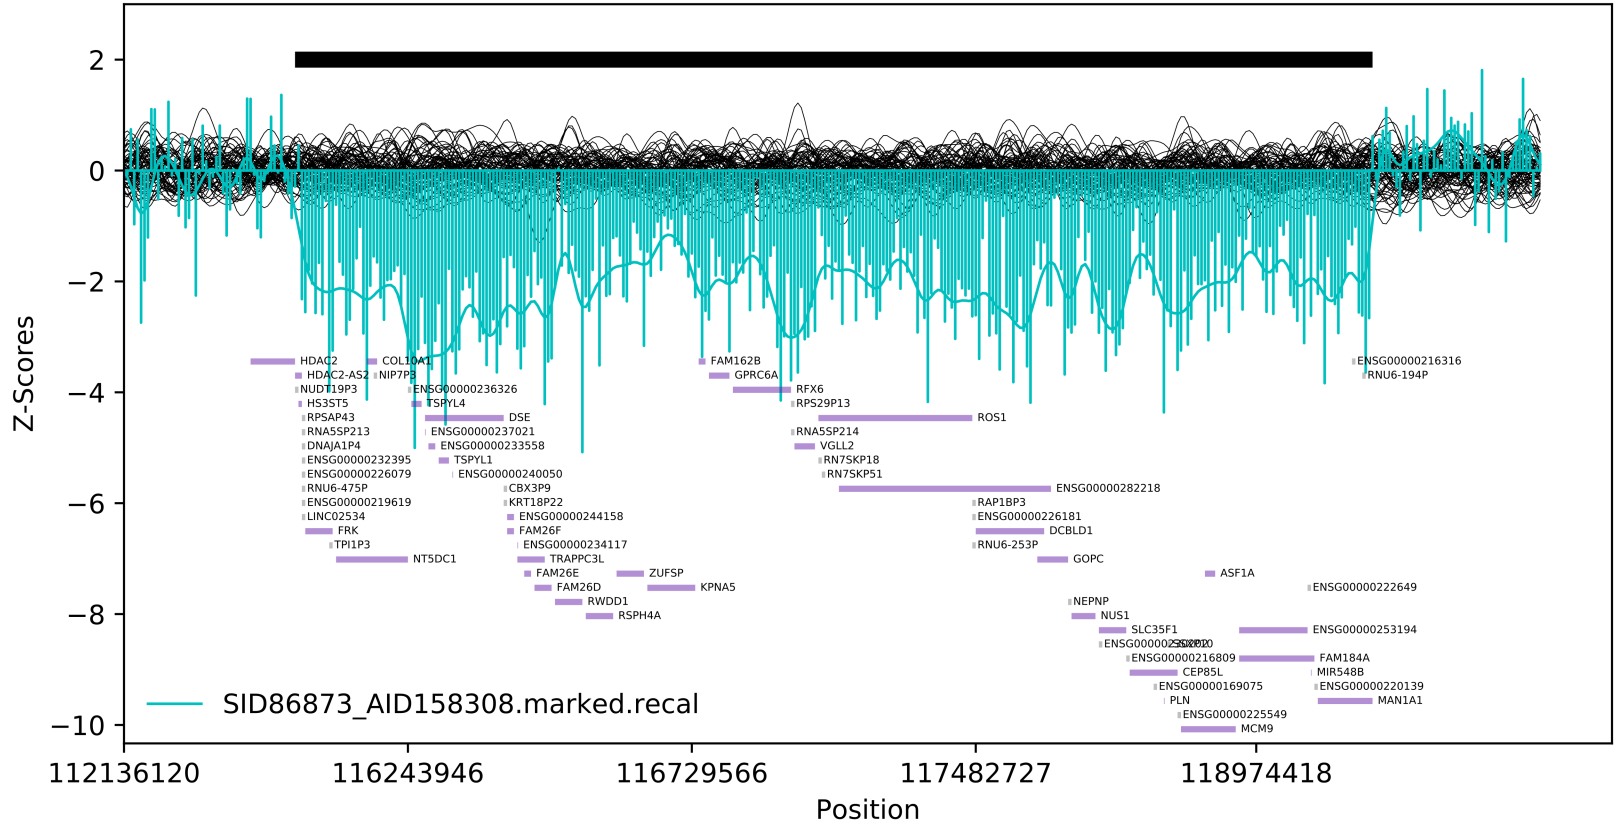**B**

## conifer del chr9: 127523499 - 128122472

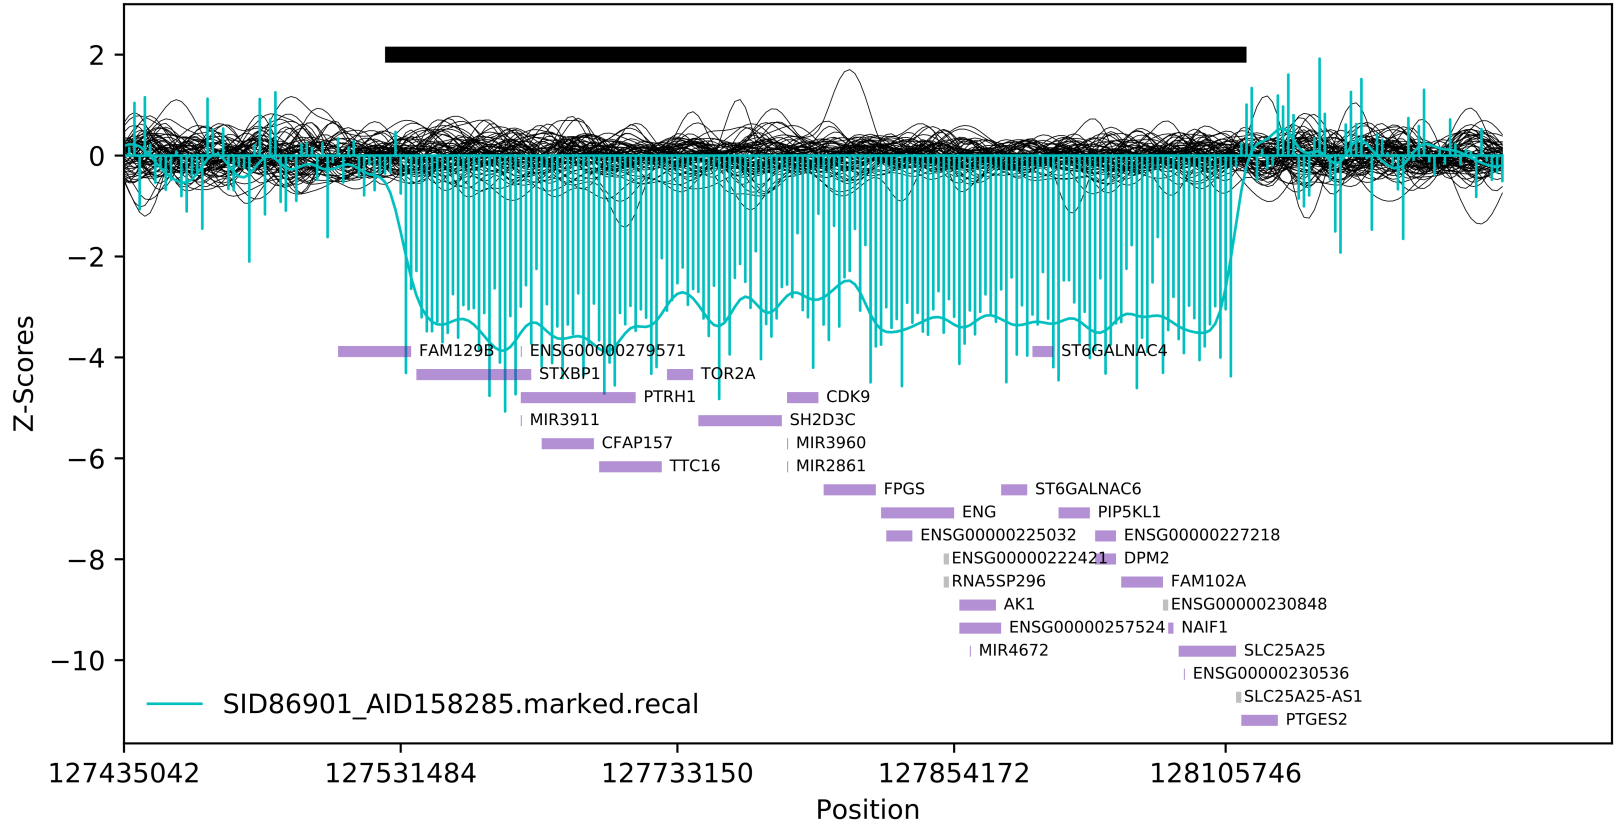

Supplement: EPI4-8-497-s001.pdf [file EPI4-8-497-s001.pdf]
